# Supplementary material for: Crystal structure, quantum chemical insights, and molecular docking studies of Naryl-2-(N-disubstituted) acetamide compounds: potential inhibitors for neurodegenerative enzymes
Source: Royal Society of Chemistry journal article supplement (doi:10.1039/d3ra08649f), 2024-01-01
Supplement: d3ra08649f1.pdf [file d3ra08649f1.pdf]

## *Supplementary Material*

### **Crystal structure, quantum chemical insights, and molecular docking studies Naryl-2-(*N*-disubstituted) acetamide compounds: potential inhibitors for neurodegenerative enzymes.**

**Lorena Camargo-Ayala<sup>1,\*</sup>, Mauricio Bedoya<sup>2,3</sup>, Luis Prent-Peñaloza<sup>4</sup>, Efraín Polo-Cuadrado<sup>1</sup>, Edison Osorio<sup>5</sup>, Iván Brito<sup>6</sup>, Gerzon E. Delgado<sup>6,7</sup>, Wendy González<sup>8,9</sup> and Margarita Gutierrez<sup>2,\*</sup>.**

<sup>1</sup> Laboratorio Síntesis Orgánica y Actividad Biológica (LSO-Act-Bio), Instituto de Química de Recursos Naturales, Universidad de Talca, Casilla 747, Talca 3460000, Chile.

<sup>2</sup> Centro de Investigación de Estudios Avanzados del Maule (CIEAM), Vicerrectoría de Investigación y Postgrado, Universidad Católica del Maule, Talca 3466706, Chile.

<sup>3</sup> Laboratorio de Bioinformática y Química Computacional (LBQC), Departamento de Medicina Traslacional, Facultad de Medicina, Universidad Católica del Maule, Talca 3466706, Chile.

<sup>4</sup> Departamento de Ciencias Químicas, Facultad de Ciencias Exactas, Universidad Andrés Bello, Quillota 980, Viña del Mar, Chile.

<sup>5</sup> Facultad de Ciencias Naturales y Matemáticas, Universidad de Ibagué, Carrera 22 Calle 67, Ibagué 730001, Colombia

<sup>6</sup> Departamento de Química, Facultad de Ciencias Básicas, Universidad de Antofagasta, Avda., Universidad de Antofagasta, Campus Coloso, Antofagasta 02800, Chile.

<sup>7</sup> Departamento de Química, Facultad de Ciencias, Universidad de Los Andes, Mérida 5101, Venezuela.

<sup>8</sup> Centro de Bioinformática y Simulaciones Moleculares (CBSM), Universidad de Talca, Casilla 747, Talca 3460000, Chile.

<sup>9</sup> Facultad de Ingeniería and Millennium Nucleus of Ion Channels-Associated Diseases (MiNICAD), Universidad de Talca, 3460000 Talca, Chile.

**\*Correspondence:**

Margarita Gutiérrez  
([mgutierrez@utalca.cl](mailto:mgutierrez@utalca.cl))

Lorena Camargo-Ayala  
([loreca17@gmail.com](mailto:loreca17@gmail.com))

# 1 Supplementary Data

## 1.1 Characterization data

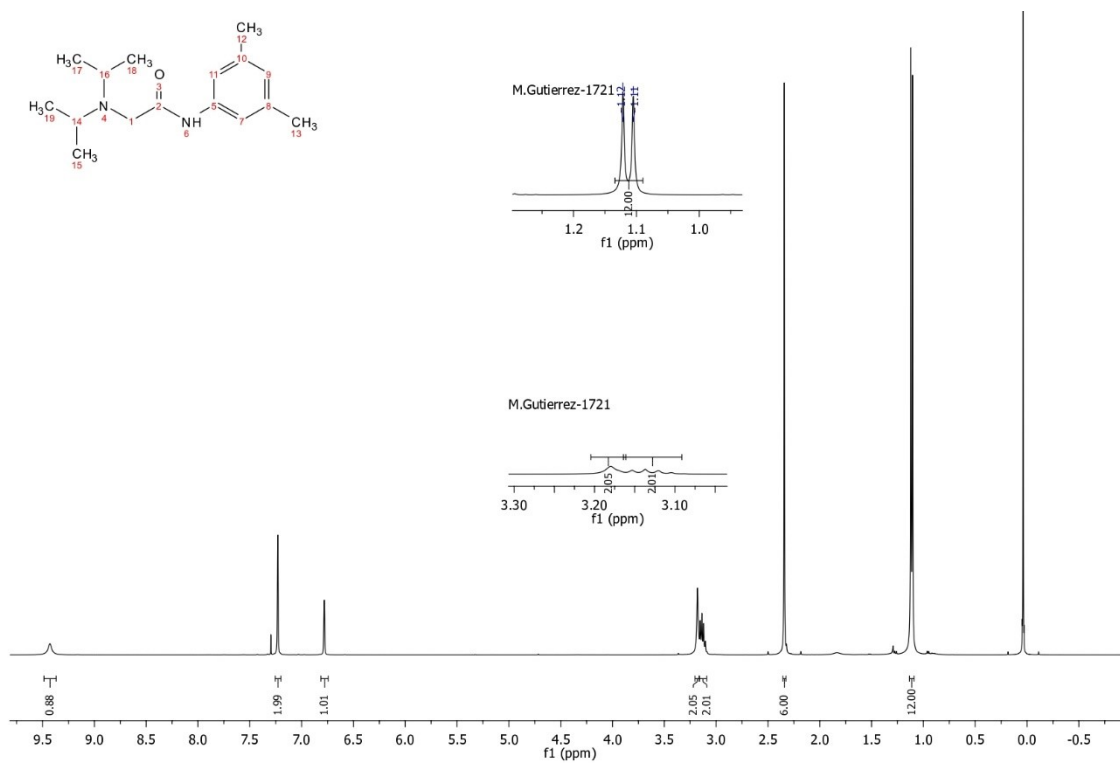

**Fig S 1.**  $^1\text{H-NMR}$  (400 MHz,  $\text{CDCl}_3$ ) of 2-(diisopropylamino)-*N*-(3,5-dimethylphenyl)acetamide (5a)

M.Gutierrez-1721  
LA-12

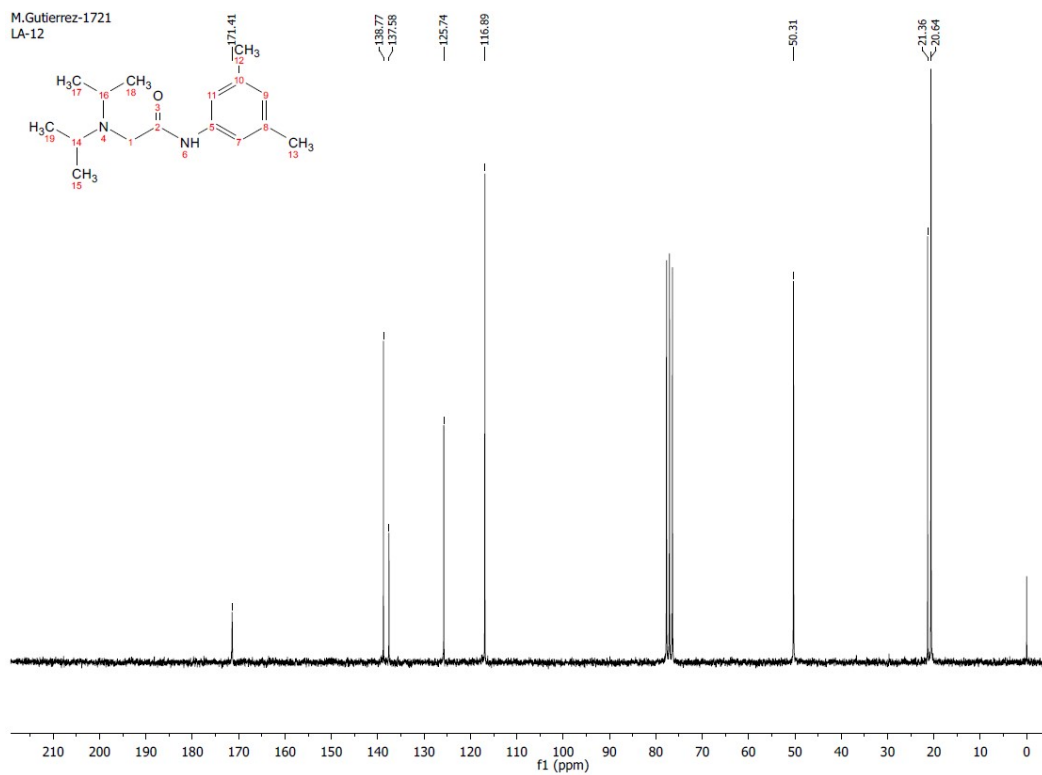

**Fig S 2.** <sup>13</sup>C- NMR (100 MHz, CDCl<sub>3</sub>) of 2-(diisopropylamino)-*N*-(3,5-dimethylphenyl)acetamide (5a)

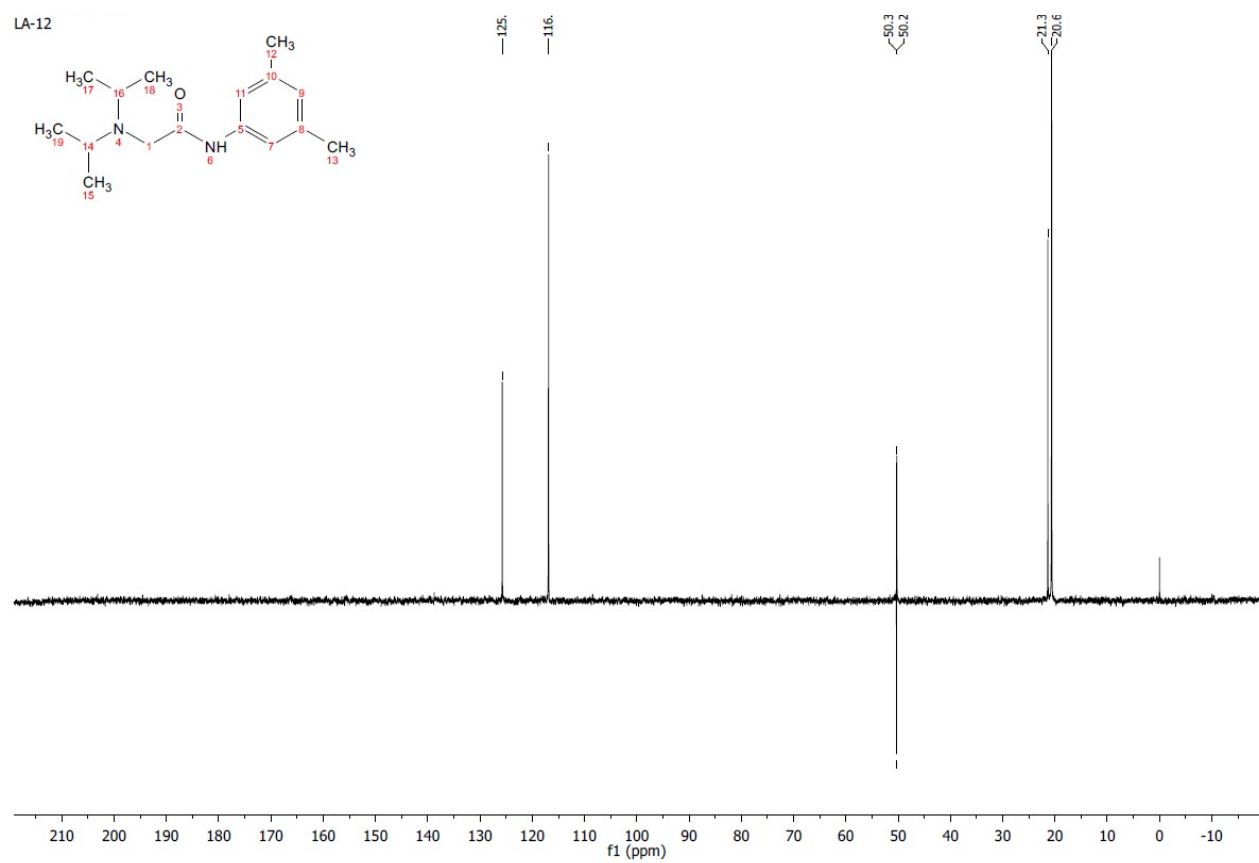

**Fig S 3.** DEPT-135 (CDCl<sub>3</sub>) of 2-(diisopropylamino)-*N*-(3,5-dimethylphenyl)acetamide (5a)

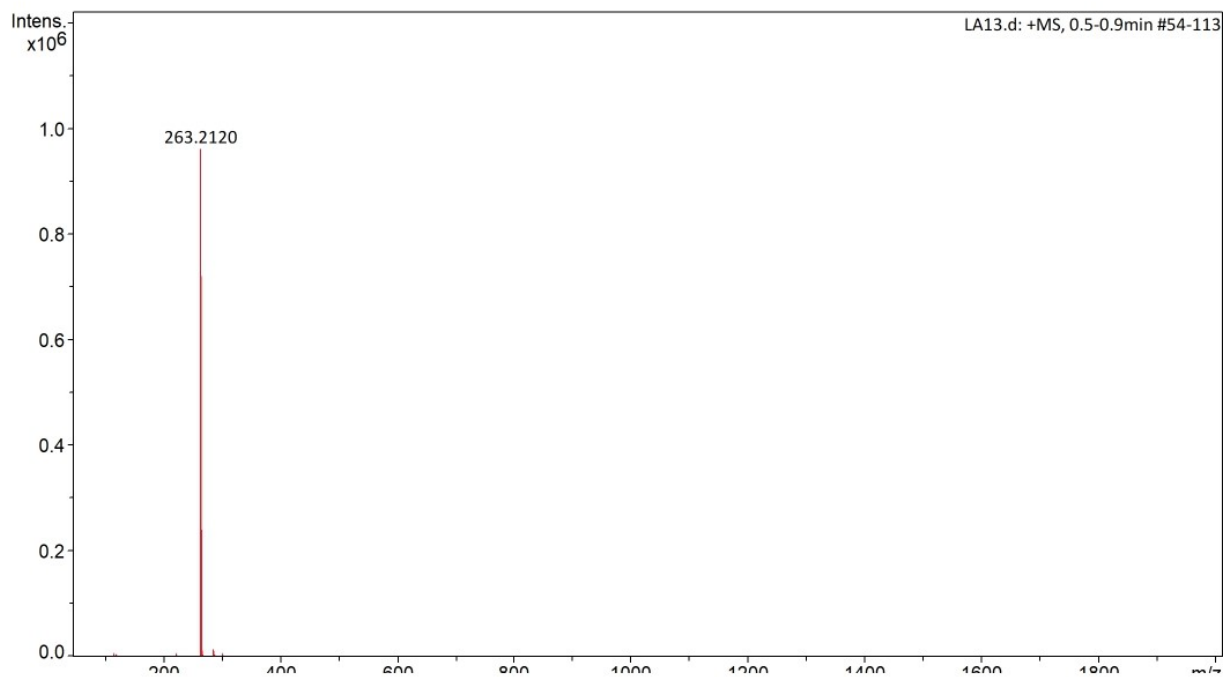

**Fig S 4.** HRMS (ESI, m/z) of 2-(diisopropylamino)-*N*-(3,5-dimethylphenyl)acetamide (5a)

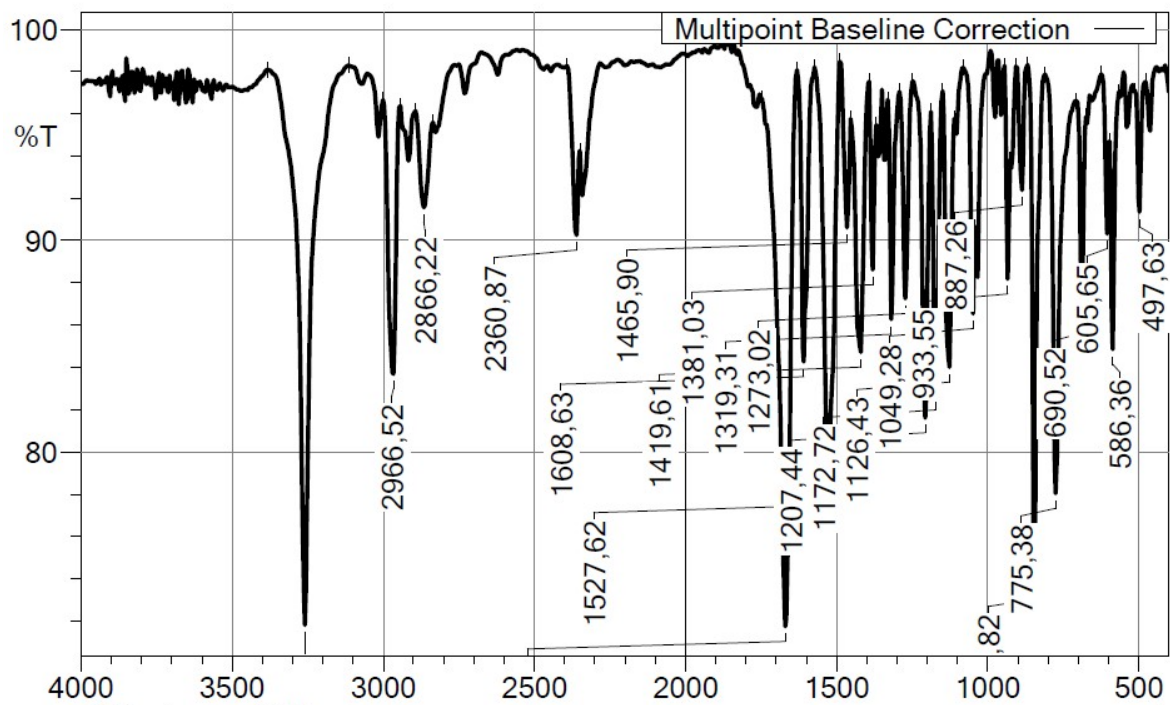

**Fig S 5.** IR of of 2-(diisopropylamino)-*N*-(3,5-dimethylphenyl)acetamide (5a)

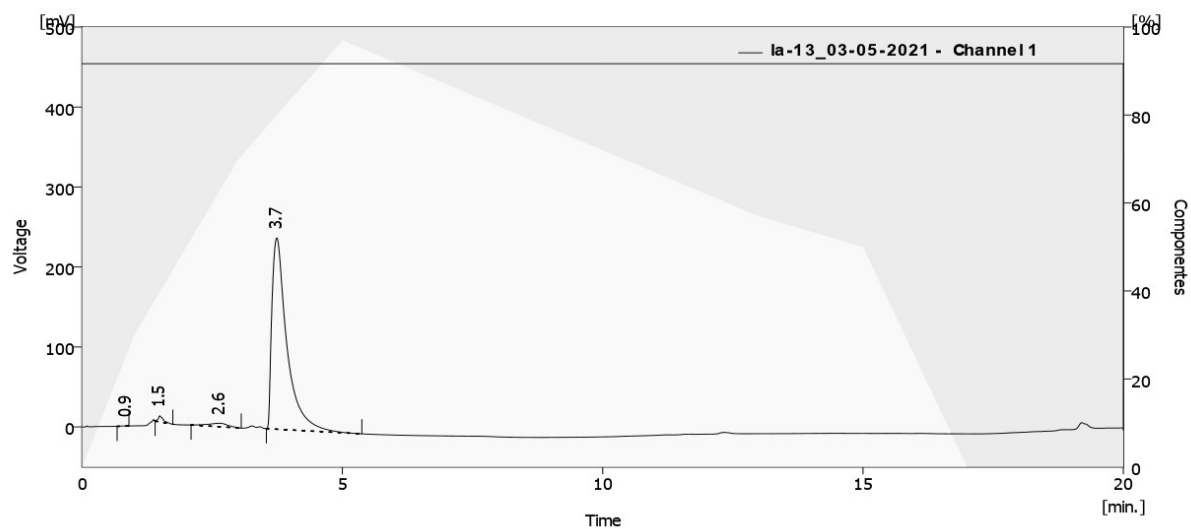

Tabla de resultados (Sin cal. - la-13\_03-05-2021 - Channel 1)

|   | Tiempo de retenc [min] | Área [mV.s] | Altura [mV] | Area [%] | Altura [%] | A05 [min] | PDA Peak Purity | Nombre Compuesto |
|---|------------------------|-------------|-------------|----------|------------|-----------|-----------------|------------------|
| 1 | 0.857                  | 2.681       | 0.226       | 0.1      | 0.1        | 0.12      | 1000            |                  |
| 2 | 1.493                  | 52.462      | 7.620       | 1.1      | 3.0        | 0.09      | 654             |                  |
| 3 | 2.637                  | 115.516     | 4.425       | 2.3      | 1.8        | 0.63      | 647             |                  |
| 4 | 3.740                  | 4804.234    | 239.256     | 96.6     | 95.1       | 0.28      | 935             |                  |
|   | Total                  | 4974.893    | 251.528     | 100.0    | 100.0      |           |                 |                  |

**Fig S 6.** HPLC of 2-(diisopropylamino)-N-(3,5-dimethylphenyl)acetamide (5a)

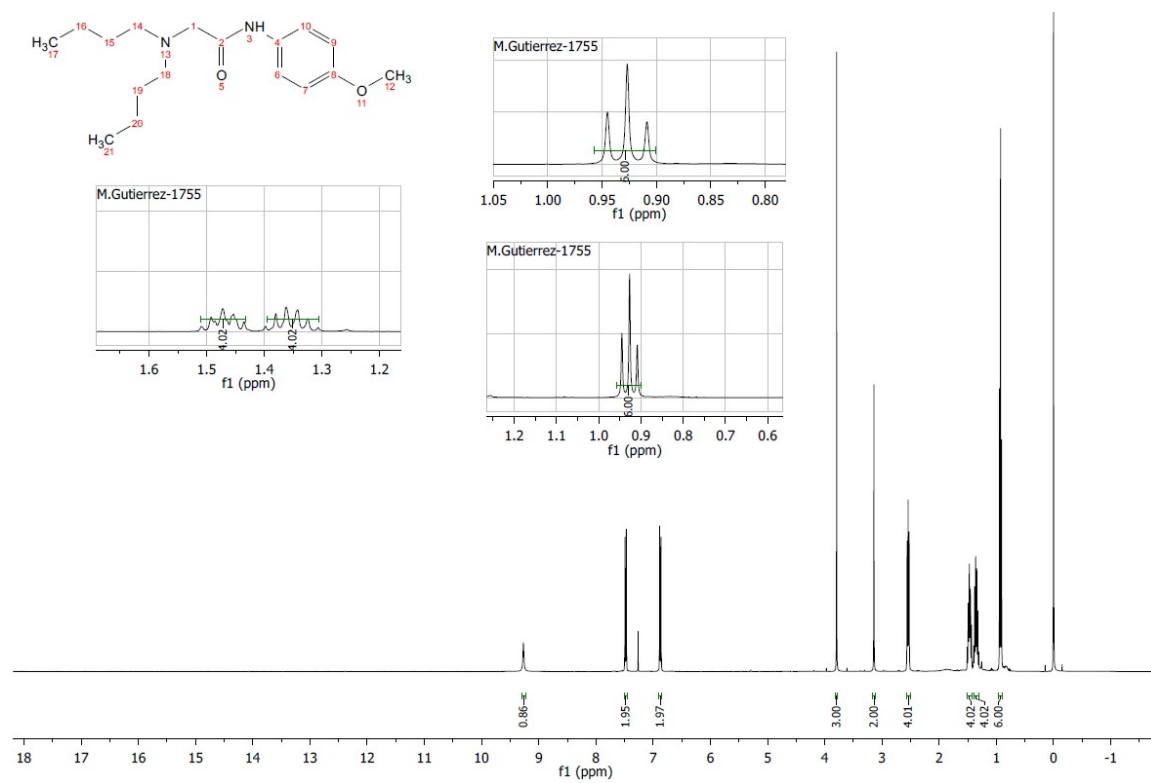

**Fig S 7.** <sup>1</sup>H-NMR (400 MHz, CDCl<sub>3</sub>) of 2-(dibutylamino)-*N*-(4-methoxyphenyl)acetamide (5b)



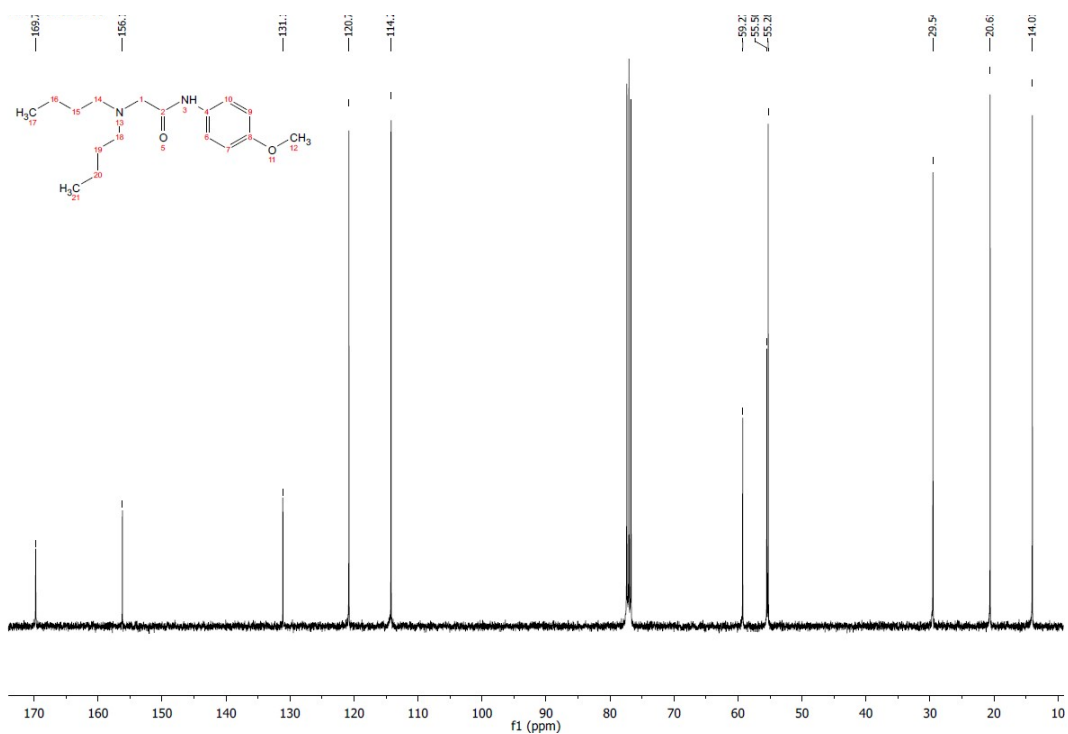

**Fig S 8.** <sup>13</sup>C-NMR (100 MHz, CDCl<sub>3</sub>) of 2-(dibutylamino)-*N*-(4-methoxyphenyl)acetamide (5b)

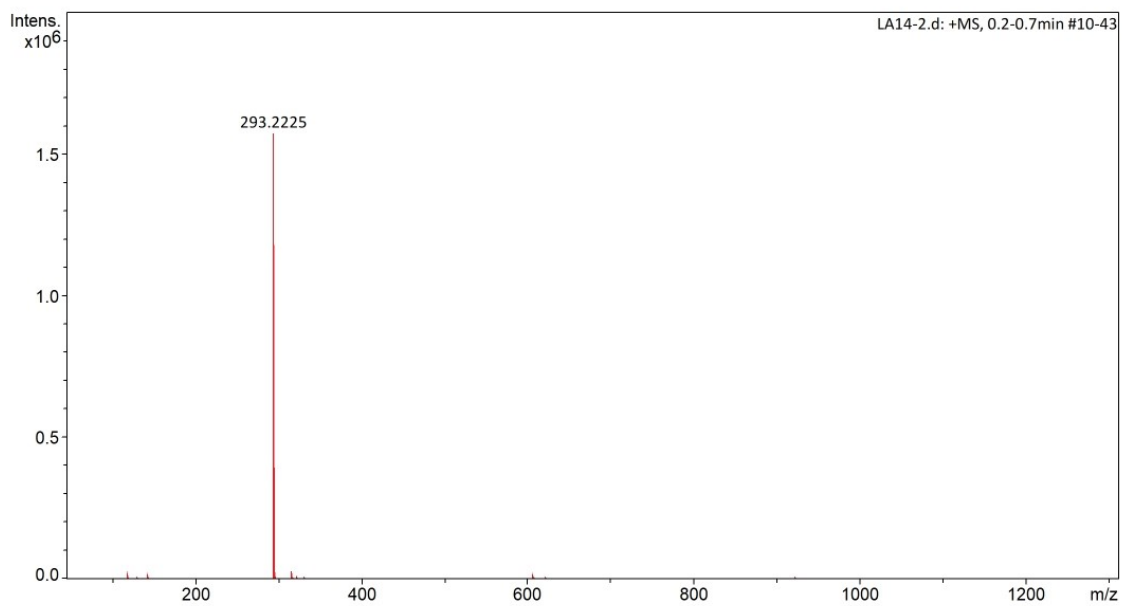

**Fig S 9.** HRMS (ESI, m/z) of 2-(dibutylamino)-*N*-(4-methoxyphenyl)acetamide (5b)

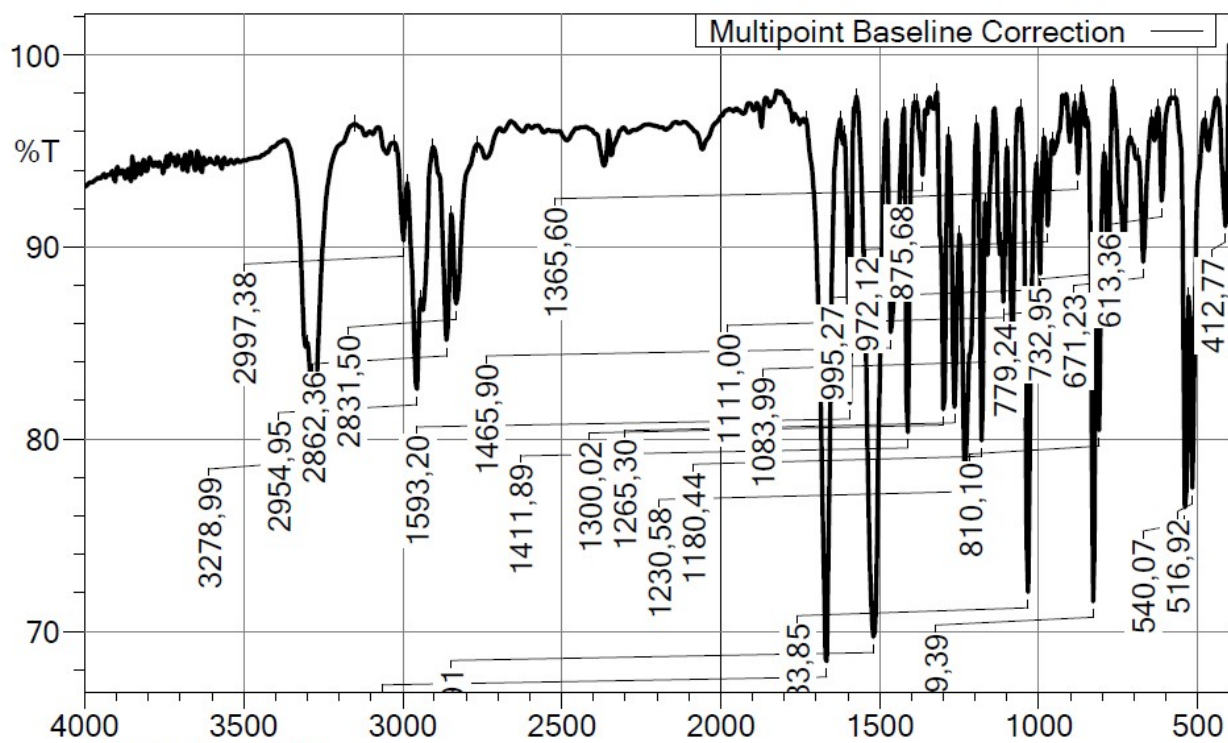

**Fig S 10.** IR of 2-(dibutylamino)-*N*-(4-methoxyphenyl)acetamide (5b)

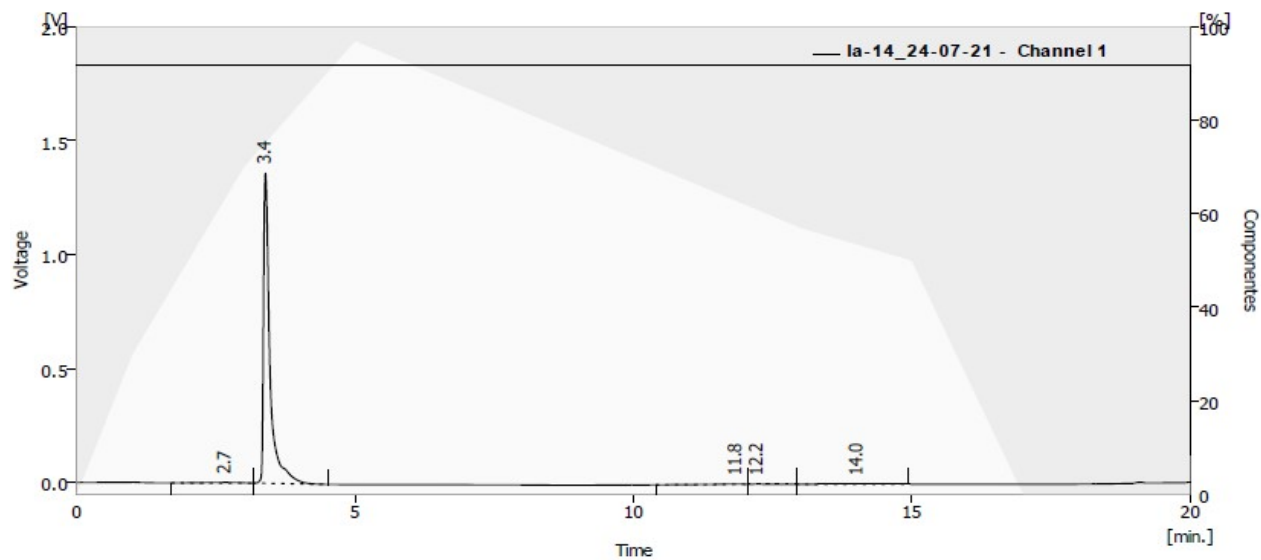

Tabla de resultados (Sin cal. - la-14\_24-07-21 - Channel 1)

|   | Tiempo de retenc. [min] | Area [mV.s] | Altura [mV] | Area [%] | Altura [%] | A05 [min] | PDA Peak Purity | Nombre Compuesto |
|---|-------------------------|-------------|-------------|----------|------------|-----------|-----------------|------------------|
| 1 | 2.673                   | 123.030     | 2.473       | 1.1      | 0.2        | 0.87      | 683             |                  |
| 2 | 3.393                   | 11128.945   | 1360.230    | 98.2     | 99.6       | 0.10      | 512             |                  |
| 3 | 11.843                  | 53.257      | 1.543       | 0.5      | 0.1        | 0.38      | 1000            |                  |
| 4 | 12.227                  | 13.285      | 0.658       | 0.1      | 0.0        | 0.27      | 1000            |                  |
| 5 | 14.020                  | 17.816      | 0.275       | 0.2      | 0.0        | 0.86      | 1000            |                  |
|   | Total                   | 11336.333   | 1365.180    | 100.0    | 100.0      |           |                 |                  |

**Fig S 11.** HPLC of 2-(dibutylamino)-N-(4-methoxyphenyl)acetamide (5b)

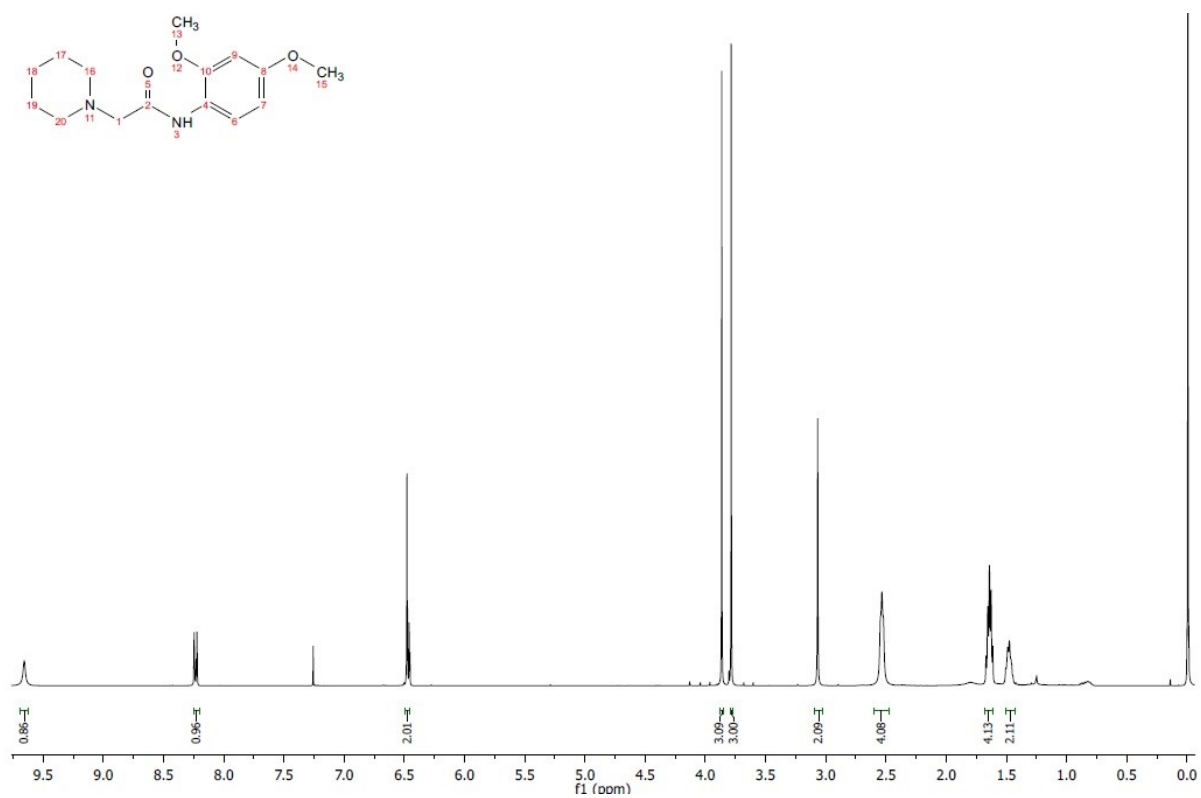

**Fig S 12.** <sup>1</sup>H-NMR (400 MHz, CDCl<sub>3</sub>) of *N*-(2,4-dimethoxyphenyl)-2-(piperidin-1-yl)acetamide (5c)

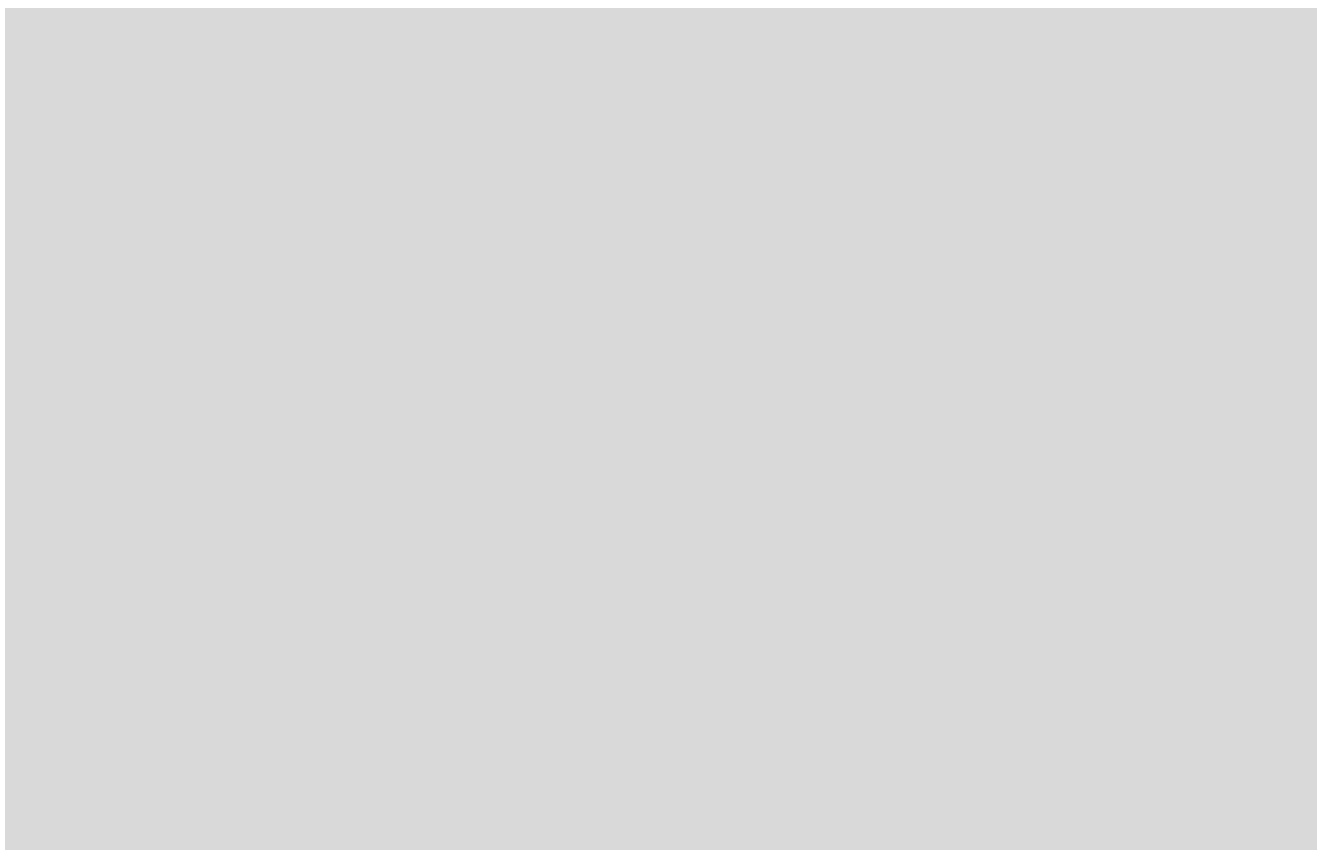

**Fig S 13.**  $^{13}\text{C}$ -NMR (100 MHz,  $\text{CDCl}_3$ ) of *N*-(2,4-dimethoxyphenyl)-2-(piperidin-1-yl)acetamide (5c)

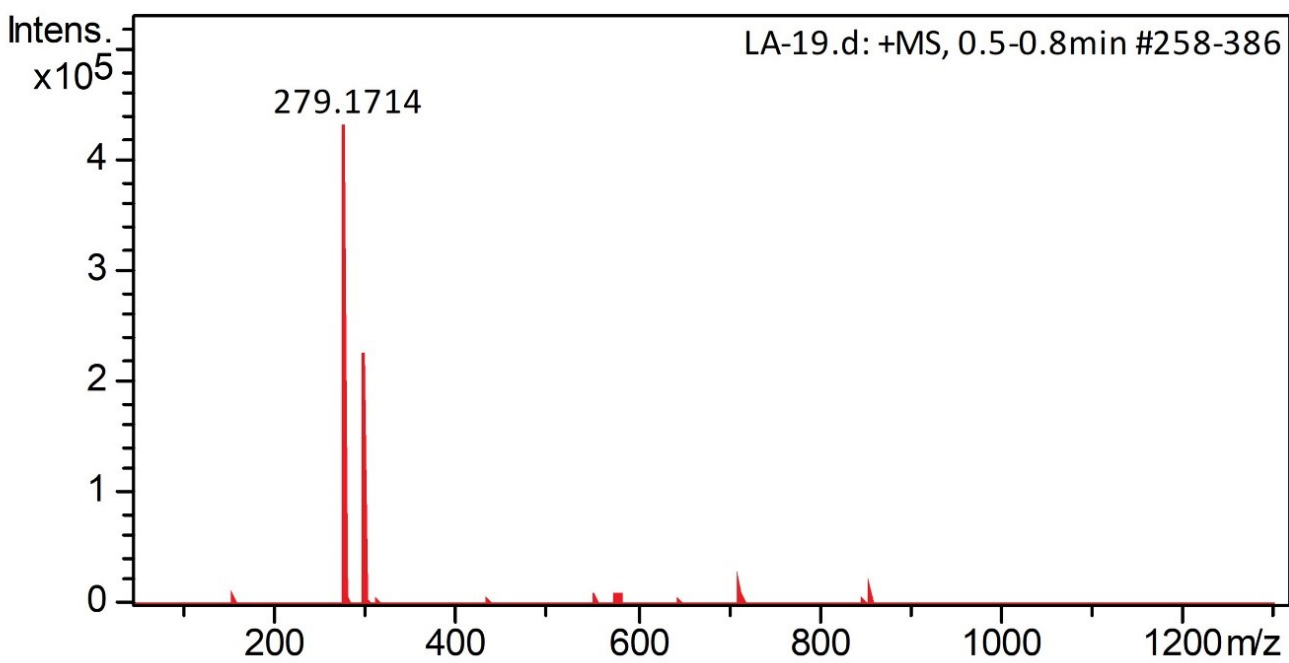

**Fig S 14.** HRMS (ESI, m/z) of *N*-(2,4-dimethoxyphenyl)-2-(piperidin-1-yl)acetamide (5c)

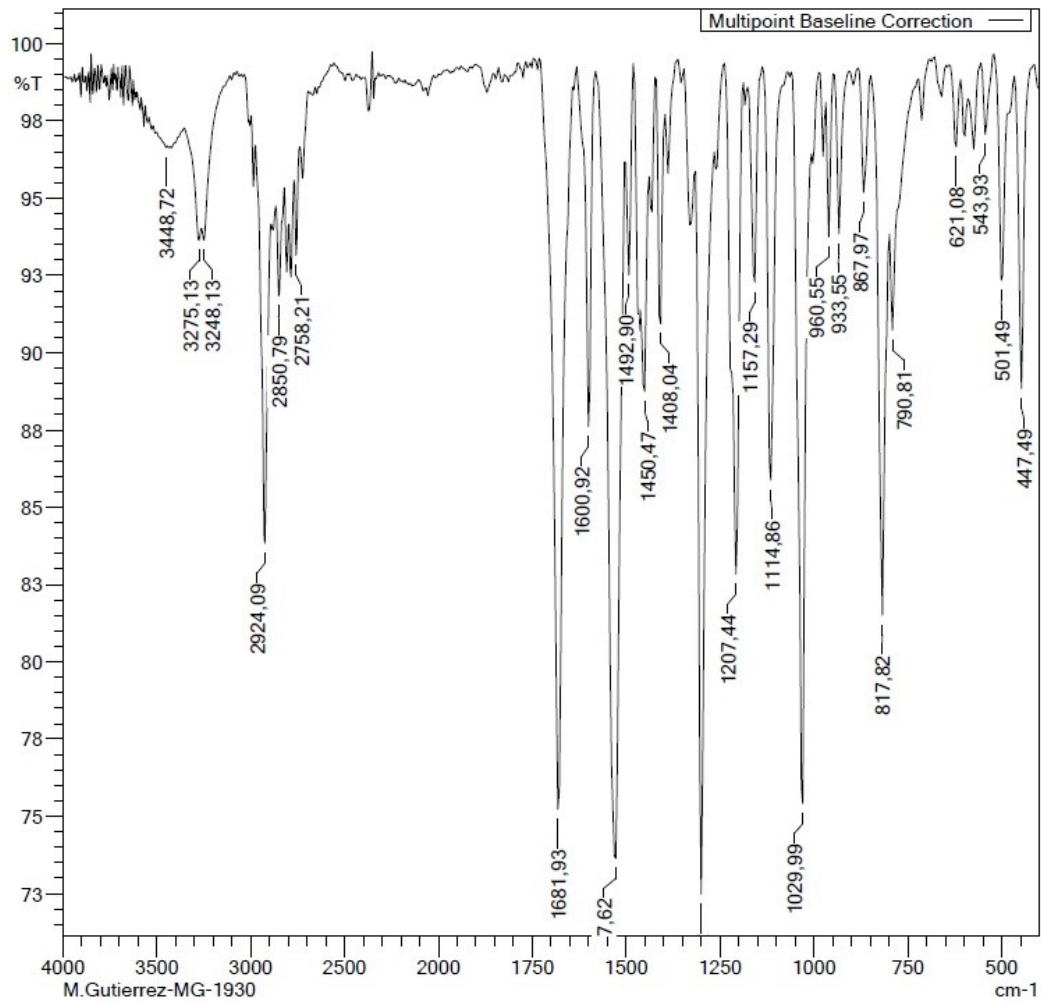

**Fig S 15.** HPLC of *N*-(2,4-dimethoxyphenyl)-2-(piperidin-1-yl)acetamide (5c)



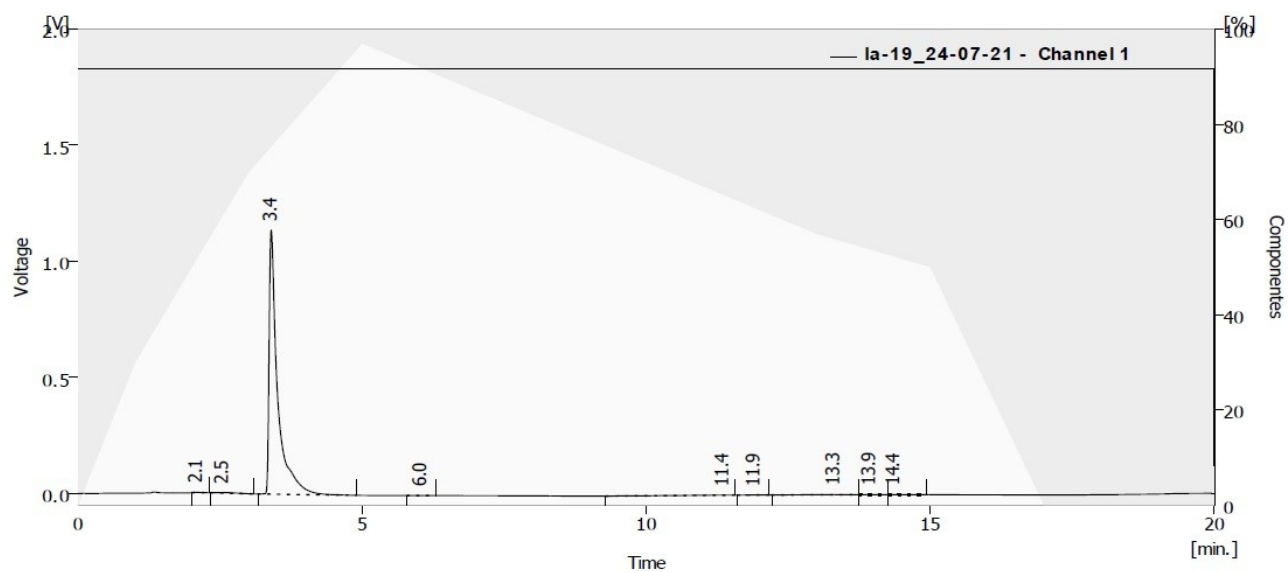

Tabla de resultados (Sin cal. - la-19\_24-07-21 - Channel 1)

|   | Tiempo de retenc [min] | Área [mV.s] | Altura [mV] | Area [%] | Altura [%] | A05 [min] | PDA Peak Purity | Nombre Compuesto |
|---|------------------------|-------------|-------------|----------|------------|-----------|-----------------|------------------|
| 1 | 2.083                  | 13.268      | 1.212       | 0.1      | 0.1        | 0.17      | 991             |                  |
| 2 | 2.543                  | 61.638      | 2.217       | 0.5      | 0.2        | 0.38      | 755             |                  |
| 3 | 3.400                  | 11813.634   | 1137.463    | 98.2     | 99.3       | 0.13      | 583             |                  |
| 4 | 6.030                  | 9.851       | 0.596       | 0.1      | 0.1        | 0.30      | 995             |                  |
| 5 | 11.353                 | 56.946      | 0.678       | 0.5      | 0.1        | 0.39      | 1000            |                  |
| 6 | 11.900                 | 11.168      | 0.634       | 0.1      | 0.1        | 0.40      | 1000            |                  |
| 7 | 13.303                 | 41.922      | 1.010       | 0.3      | 0.1        | 0.52      | 1000            |                  |
| 8 | 13.933                 | 14.267      | 0.877       | 0.1      | 0.1        | 0.27      | 1000            |                  |
| 9 | 14.360                 | 5.358       | 0.292       | 0.0      | 0.0        | 0.28      | 1000            |                  |
|   | Total                  | 12028.053   | 1144.978    | 100.0    | 100.0      |           |                 |                  |

Fig S 16. HPLC of *N*-(2,4-dimethoxyphenyl)-2-(piperidin-1-yl)acetamide (5c)

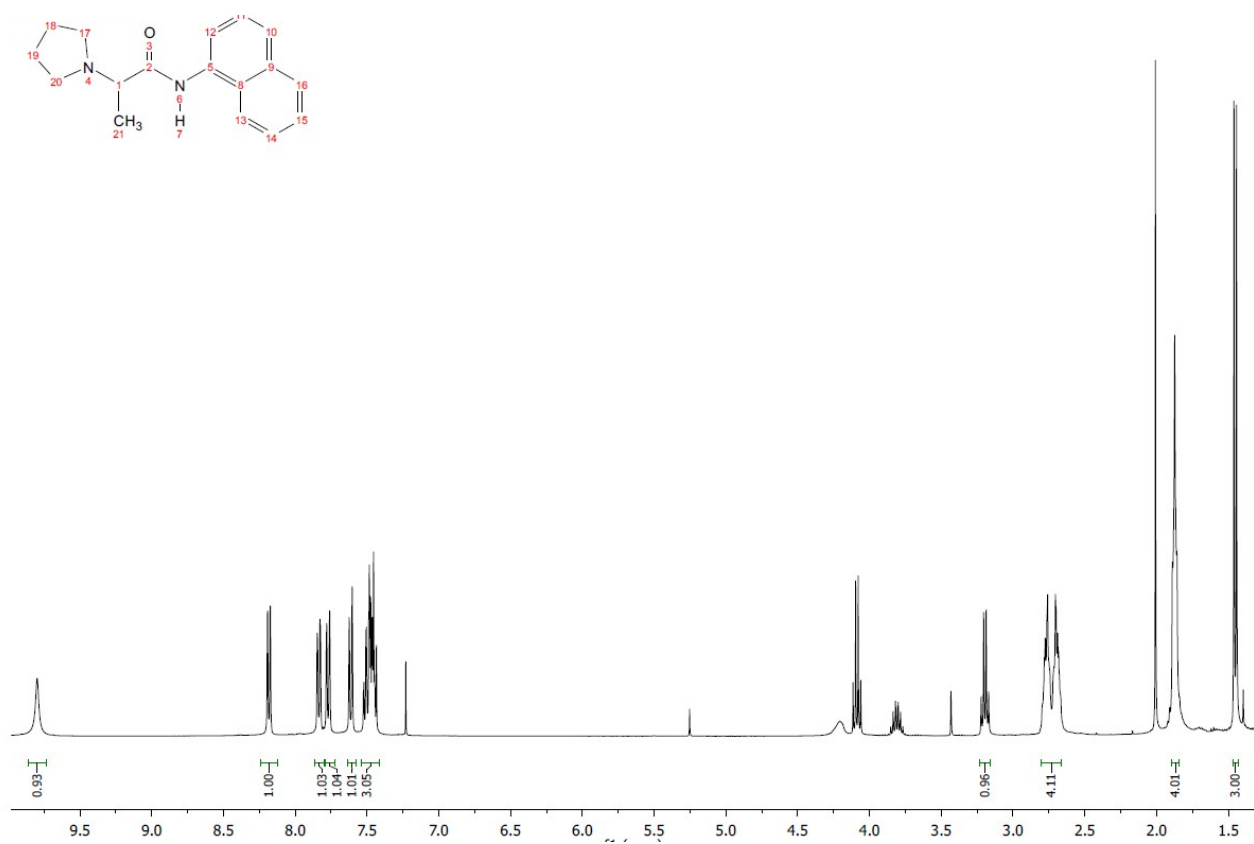

**Fig S 17.** <sup>1</sup>H- NMR (400 MHz, CDCl<sub>3</sub>) of *N*-(naphthalen-1-yl)-2-(pyrrolidin-1-yl)propanamide (5d)

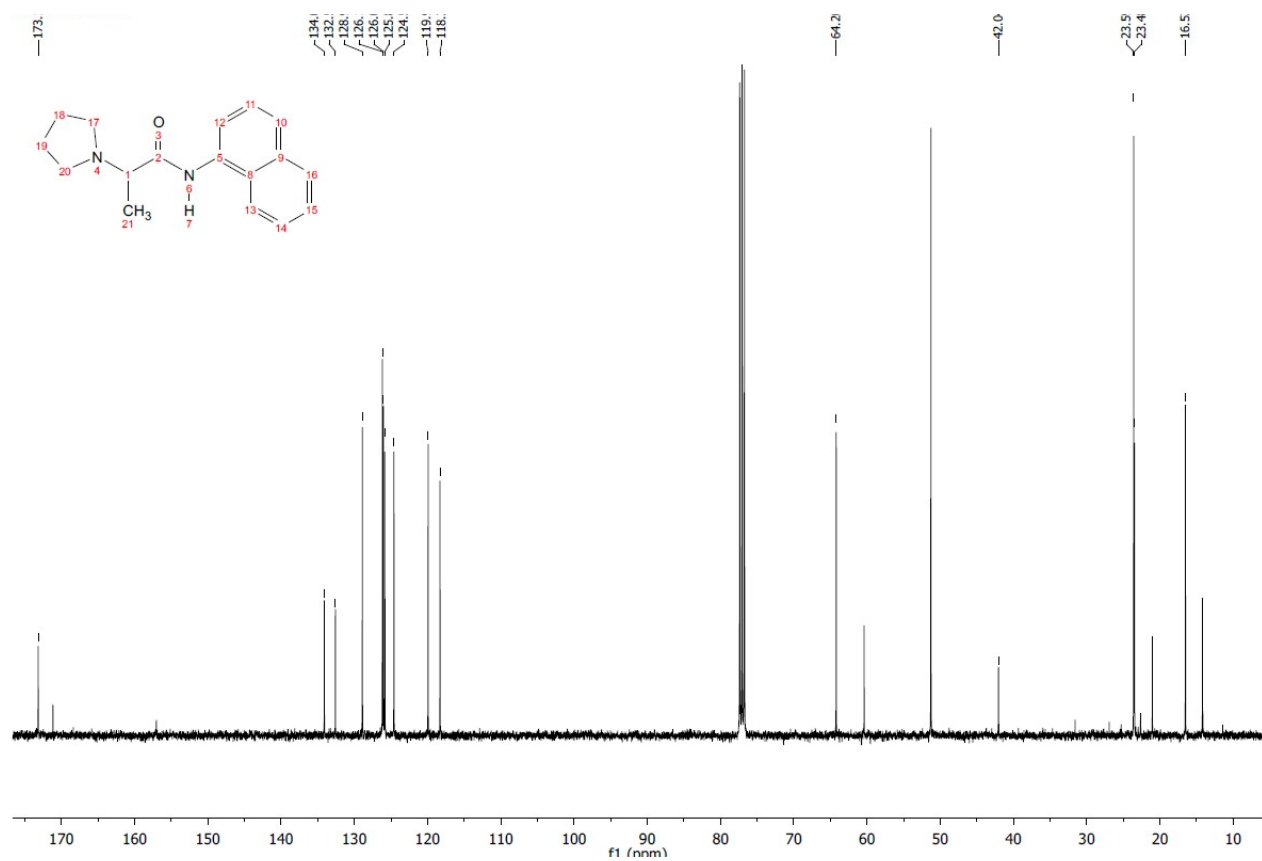

**Fig S 18.** <sup>13</sup>C- NMR (100 MHz, CDCl<sub>3</sub>) of of *N*-(naphthalen-1-yl)-2-(pyrrolidin-1-yl)propanamide (5d)

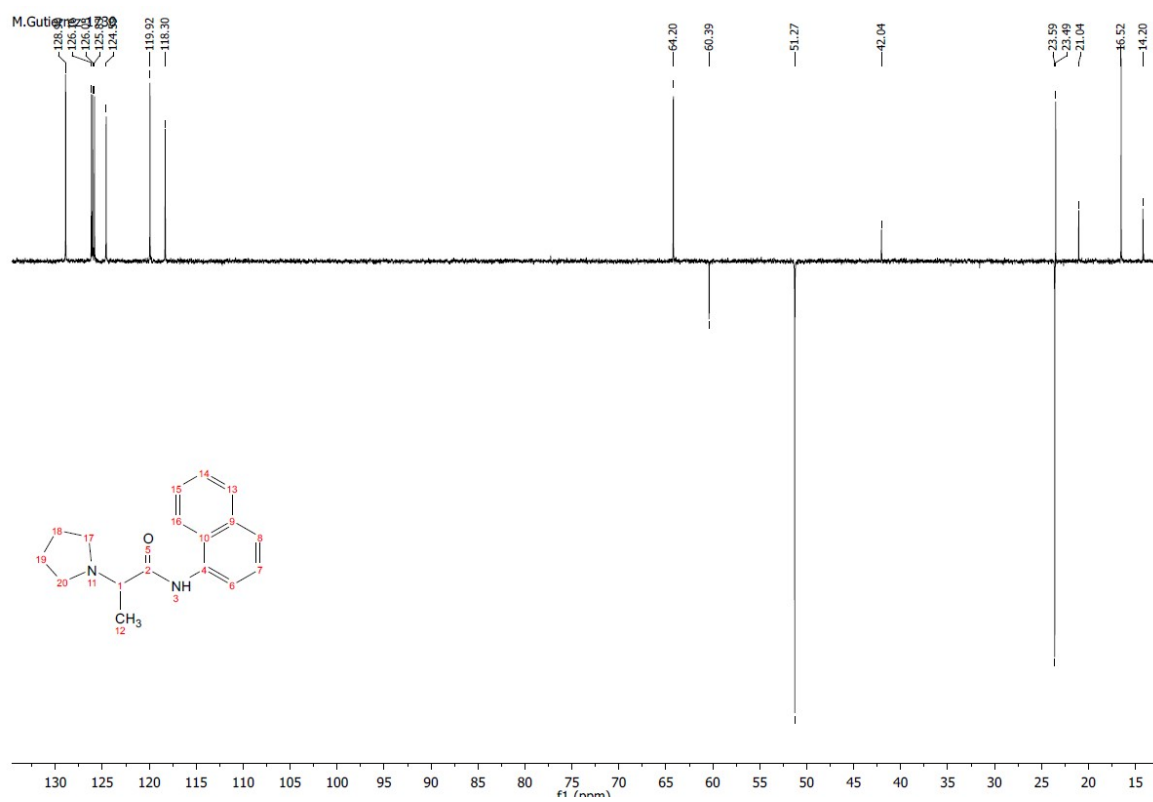

**Fig S 19.** DEPT-135 of *N*-(naphthalen-1-yl)-2-(pyrrolidin-1-yl)propanamide (5d)

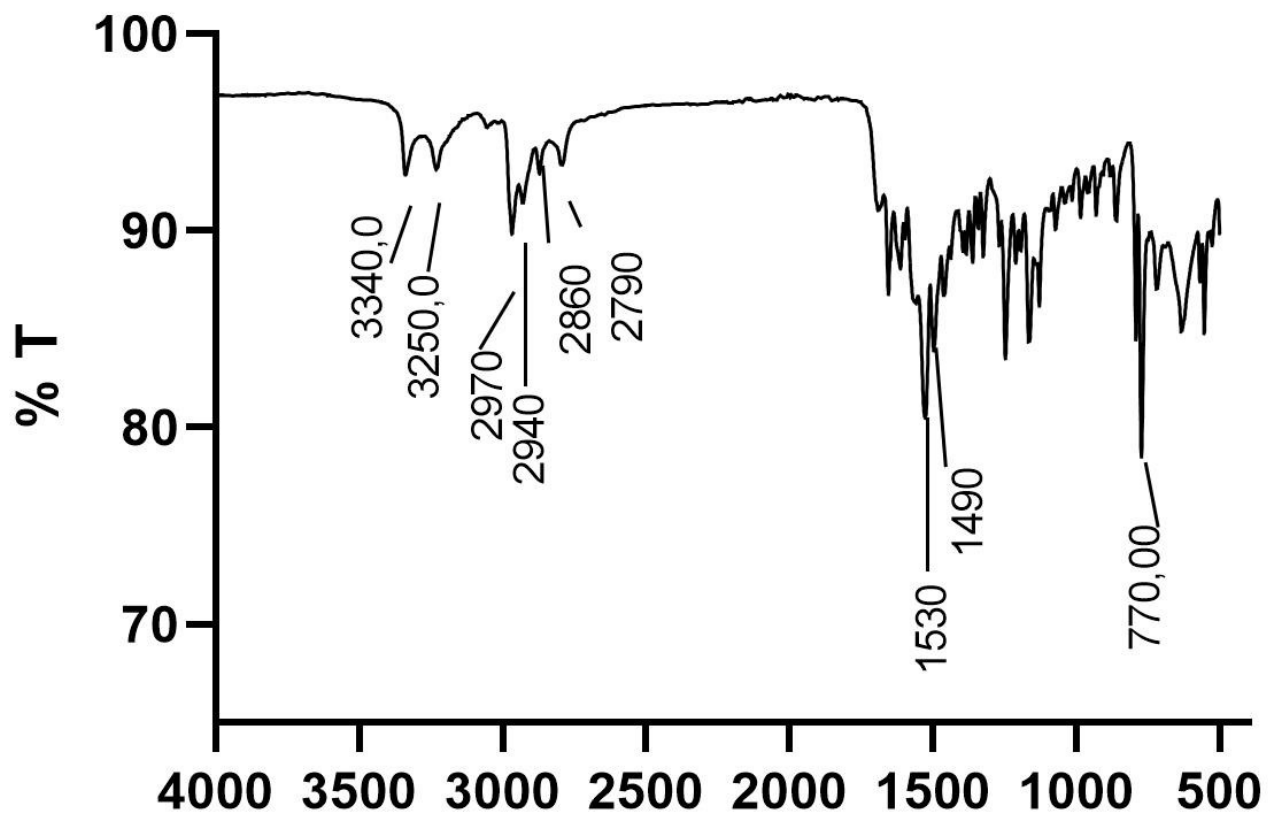

**Fig S 20.** IR of *N*-(naphthalen-1-yl)-2-(pyrrolidin-1-yl)propanamide (5d)

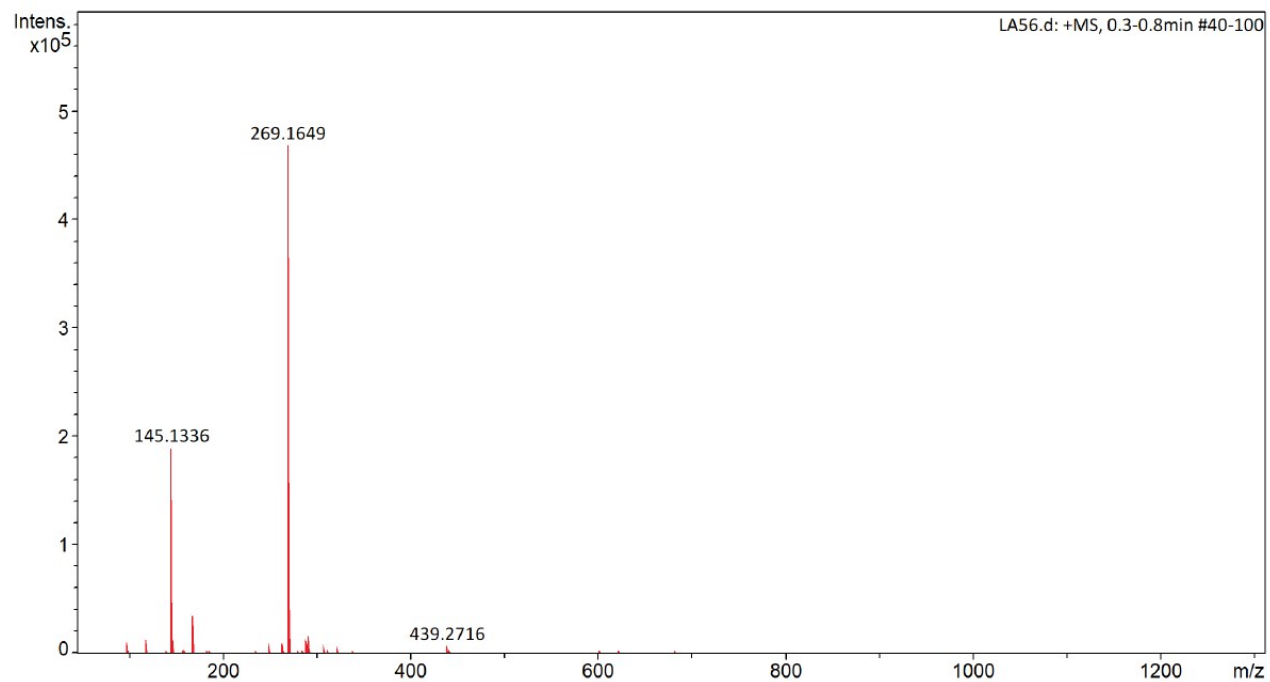

**Fig S 21.** HRMS (ESI, m/z) of *N*-(naphthalen-1-yl)-2-(pyrrolidin-1-yl)propanamide (5d)

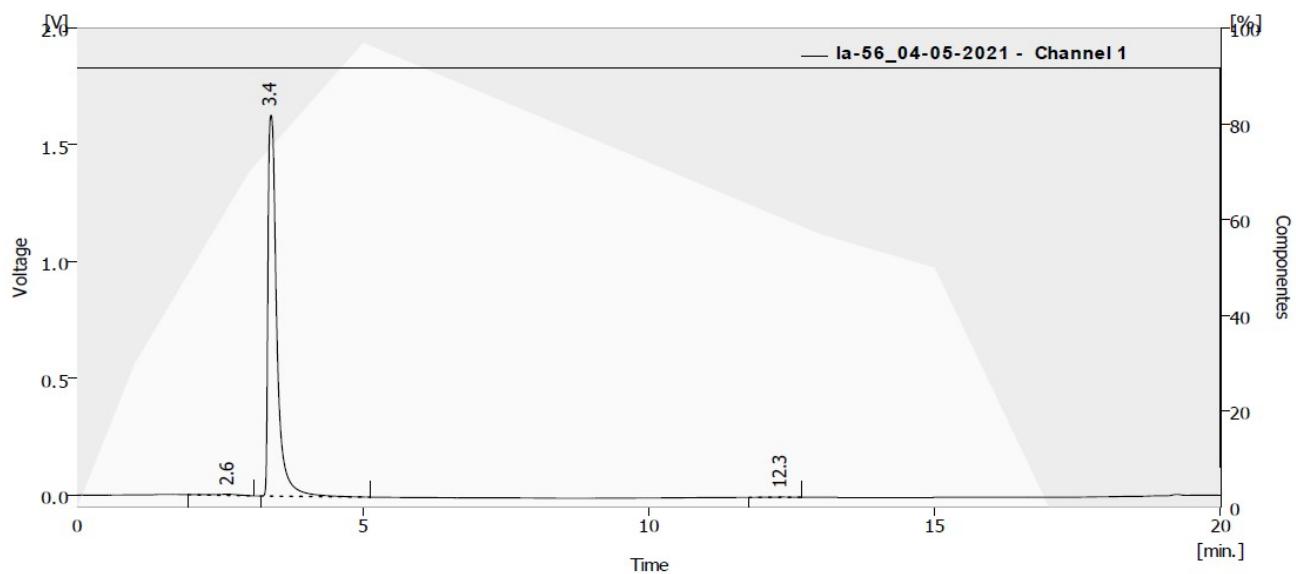

Tabla de resultados (Sin cal. - la-56\_04-05-2021 - Channel 1)

|   | Tiempo de retenc [min] | Área [mV.s] | Altura [mV] | Area [%] | Altura [%] | A05 [min] | PDA Peak Purity | Nombre Compuesto |
|---|------------------------|-------------|-------------|----------|------------|-----------|-----------------|------------------|
| 1 | 2.640                  | 154.070     | 4.755       | 0.9      | 0.3        | 0.88      | 776             |                  |
| 2 | 3.390                  | 17513.720   | 1630.825    | 99.0     | 99.6       | 0.15      | 402             |                  |
| 3 | 12.313                 | 22.616      | 1.368       | 0.1      | 0.1        | 0.20      | 998             |                  |
|   | Total                  | 17690.407   | 1636.947    | 100.0    | 100.0      |           |                 |                  |

Fig S 22. HPLC of *N*-(naphthalen-1-yl)-2-(pyrrolidin-1-yl)propenamide (5d)
